# Supplementary material for: New nickel(ii) and copper(ii) complexes with unsymmetrical Schiff bases derived from (1R,2R)(−)cyclohexanediamine and the application of Cu(ii) complexes for hybrid thin layers deposition
Source: Royal Society of Chemistry journal article supplement (doi:10.1039/c3dt50213a), 2013-01-01
Supplement: c3dt50213a_2.pdf [file c3dt50213a_2.pdf]

$R_a$  – average of image data without application of the surface height deviations measured from the mean plane.

$N$  – number of ordered, equally spaced points along the trace,  $Z_j$  is the vertical distance from the mean line to the  $j^{\text{th}}$  data point.

$R_q$  – root mean square average of height deviations taken from the mean image data plane.

| compound                                                                               | Spin coating parameters                 | $R_a$ [nm]<br>$R_a = \frac{1}{N} \sum_{j=1}^N  Z_j $ | $R_q$ [nm]<br>$R_q = \sqrt{\frac{\sum Z_j^2}{N}}$ | max peak depth [nm] |
|----------------------------------------------------------------------------------------|-----------------------------------------|------------------------------------------------------|---------------------------------------------------|---------------------|
| [Cu(II)(1 <i>R</i> ,2 <i>R</i> )-(-)chxn(3,5 <sup>t</sup> bba)(hacphen)] ( <b>3a</b> ) |                                         |                                                      |                                                   |                     |
| 1.6mg/20ml thf                                                                         | 1 min,<br>1000rpm                       | 2.51                                                 | 5.49                                              | 16.1                |
|                                                                                        | 30 s,<br>1500rpm                        | 13                                                   | 16                                                | 44                  |
|                                                                                        | 1000rpm 60s<br>(Si <sup>i</sup> PrOH)   | 1.58                                                 | 4.82                                              | 10.7                |
|                                                                                        | 800rpm 60s                              | 6.06                                                 | 14.6                                              | 84                  |
|                                                                                        | 800rpm 60s<br>(Si <sup>i</sup> PrOH)    | 4.47                                                 | 7.84                                              | 51.7                |
|                                                                                        | 1500 rpm 60 s<br>(Si <sup>i</sup> PrOH) | 5.92                                                 | 11.5                                              | 123                 |
|                                                                                        | 1500rpm 30s<br>(Si <sup>i</sup> PrOH)   | 2.34                                                 | 3.74                                              | 44                  |
|                                                                                        |                                         |                                                      |                                                   |                     |
| 5.5mg/20ml thf                                                                         | 30 s, 800rpm                            | 5.12                                                 | 6.38                                              | 35.8                |
|                                                                                        | 30 s, 2000rpm                           | 2.35                                                 | 3.38                                              | 19.40               |
|                                                                                        | 30s, 1200rpm                            | 9.05                                                 | 5.61                                              | 39                  |
|                                                                                        | 30s, 1500rpm                            | 6.81                                                 | 10.8                                              | 27.5                |
|                                                                                        | 30s, 1000rpm                            | 4.37                                                 | 9.02                                              | 20.2                |
|                                                                                        | 60s 1000rpm,<br>30s 1000rpm             | 1.17                                                 | 1.83                                              | 32                  |

|                                                                                                             |                    |      |      |              |
|-------------------------------------------------------------------------------------------------------------|--------------------|------|------|--------------|
| saturated solution                                                                                          |                    |      |      |              |
|                                                                                                             | 2000rpm 30s        | 67.7 | 119  | 932<br>77.8  |
|                                                                                                             | 1000rpm 1min       | 7.49 | 9.82 | 576<br>42.2  |
|                                                                                                             | 1500rpm 1min       | 2.46 | 3.23 | 218          |
| [Cu(II)(1 <i>R</i> ,2 <i>R</i> )-(-)chxn(3,5 <sup>t</sup> bba)(5-nba)] ( <b>1a</b> )<br>6.3 mg/20ml thf     |                    |      |      |              |
|                                                                                                             | 30s x2,<br>1000rpm | 1.25 | 1.79 | 170<br>12.3  |
|                                                                                                             | 30s x2,<br>900rpm  | 0.54 | 0.98 | 10.5<br>8.73 |
|                                                                                                             | 30s x2,<br>1100rpm | 0.66 | 1.26 | 88.9<br>11.4 |
| saturated solution                                                                                          | 1000rpm 5s         | 15.5 | 26.8 | 11.6         |
|                                                                                                             | 1000rpm 8s         | 5.49 | 7.15 | 22.3         |
|                                                                                                             | 2000rpm 4s         | 14,9 | 24,8 | 10.6         |
|                                                                                                             | 3000rpm 4s         | 9.96 | 15.6 | 127          |
|                                                                                                             | 2000rpm 8s         | 3.04 | 5.04 | 99           |
| [Cu(II)(1 <i>R</i> ,2 <i>R</i> )-(-)chxn(3,5 <sup>t</sup> bba)(3-metoxba)] ( <b>2a</b> )<br>6.6 mg/20ml thf |                    |      |      |              |
|                                                                                                             | 30sx2,<br>1000rpm  | 29.8 | 32.7 | 378<br>10.6  |
|                                                                                                             | 30s x2, 900rpm     | 18.1 | 18.1 | 84.3         |

|  |  |  |  |    |
|--|--|--|--|----|
|  |  |  |  | 35 |
|--|--|--|--|----|
