# Supplementary figures and images for: New nickel(ii) and copper(ii) complexes with unsymmetrical Schiff bases derived from (1R,2R)(−)cyclohexanediamine and the application of Cu(ii) complexes for hybrid thin layers deposition
Source: Royal Society of Chemistry journal article supplement (doi:10.1039/c3dt50213a), 2013-01-01

89-76a

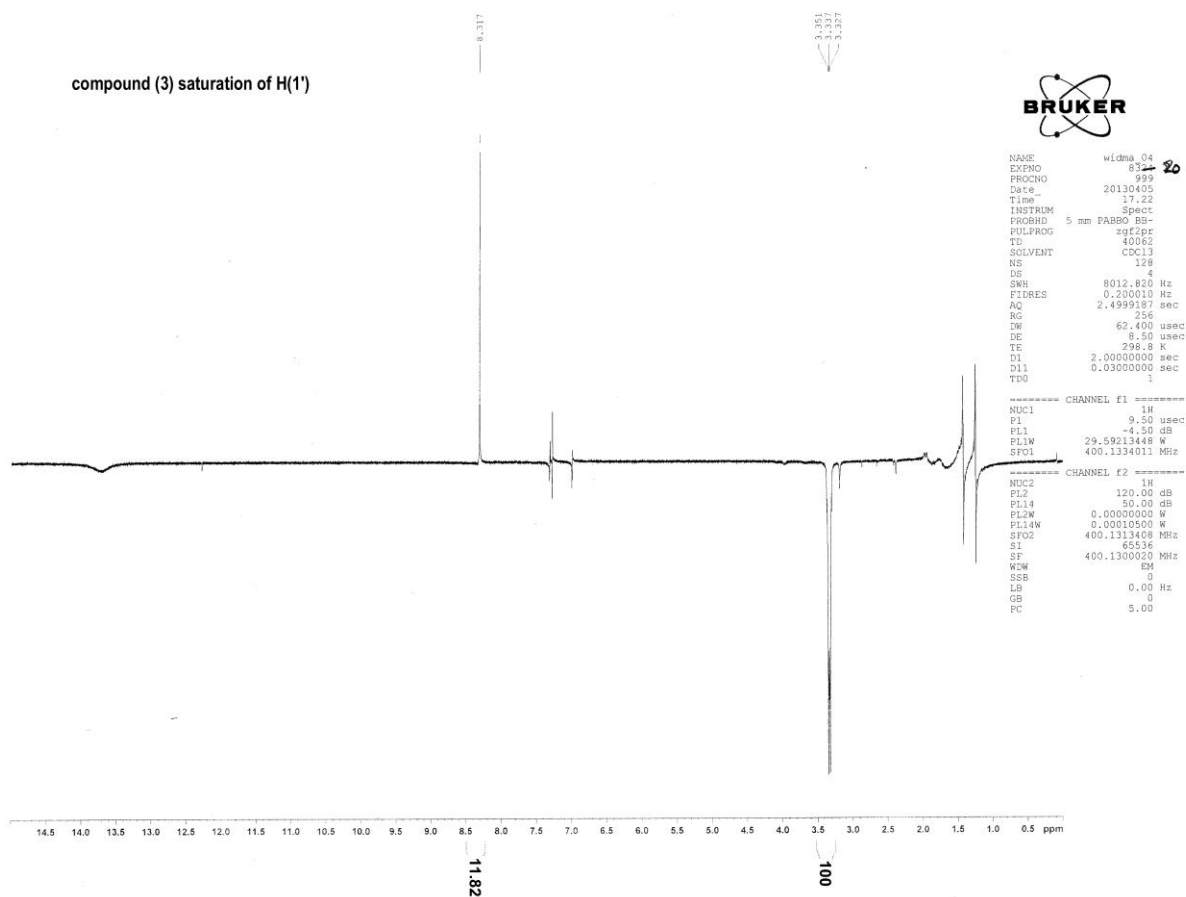

89-76d

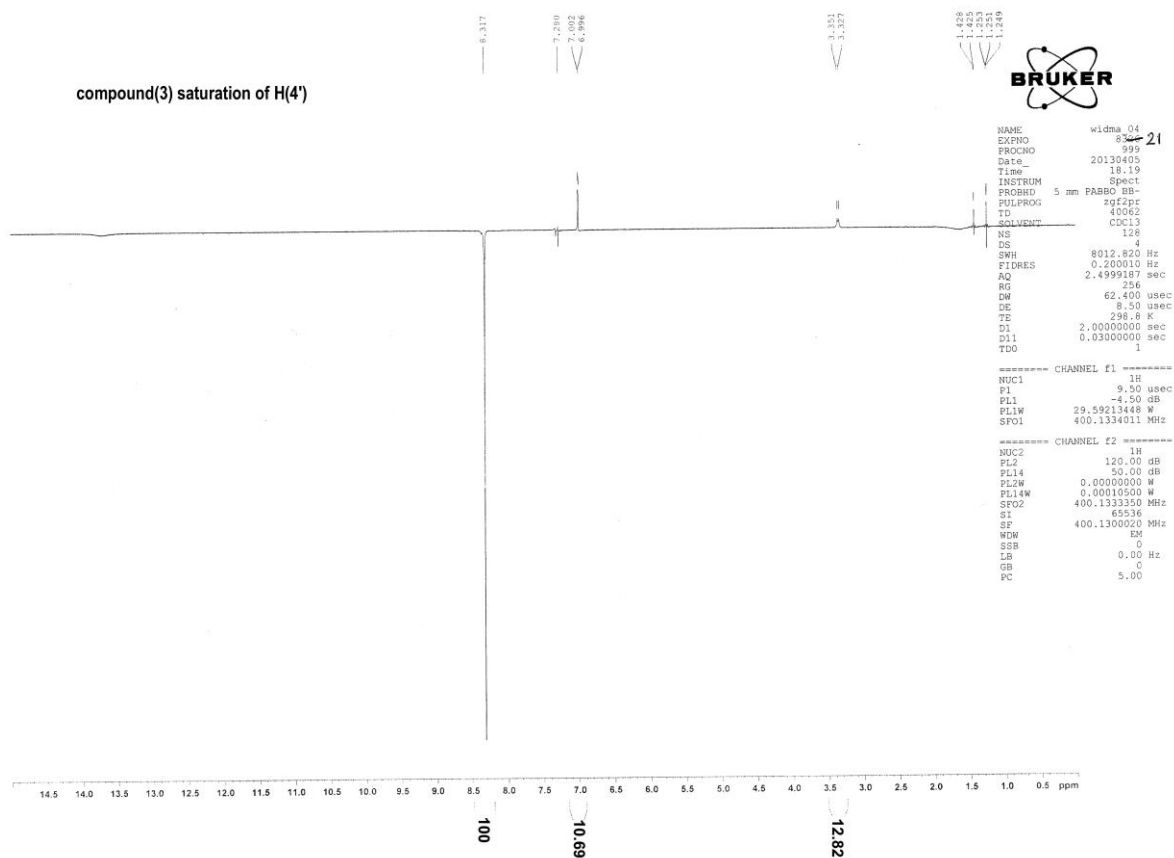

94-79a

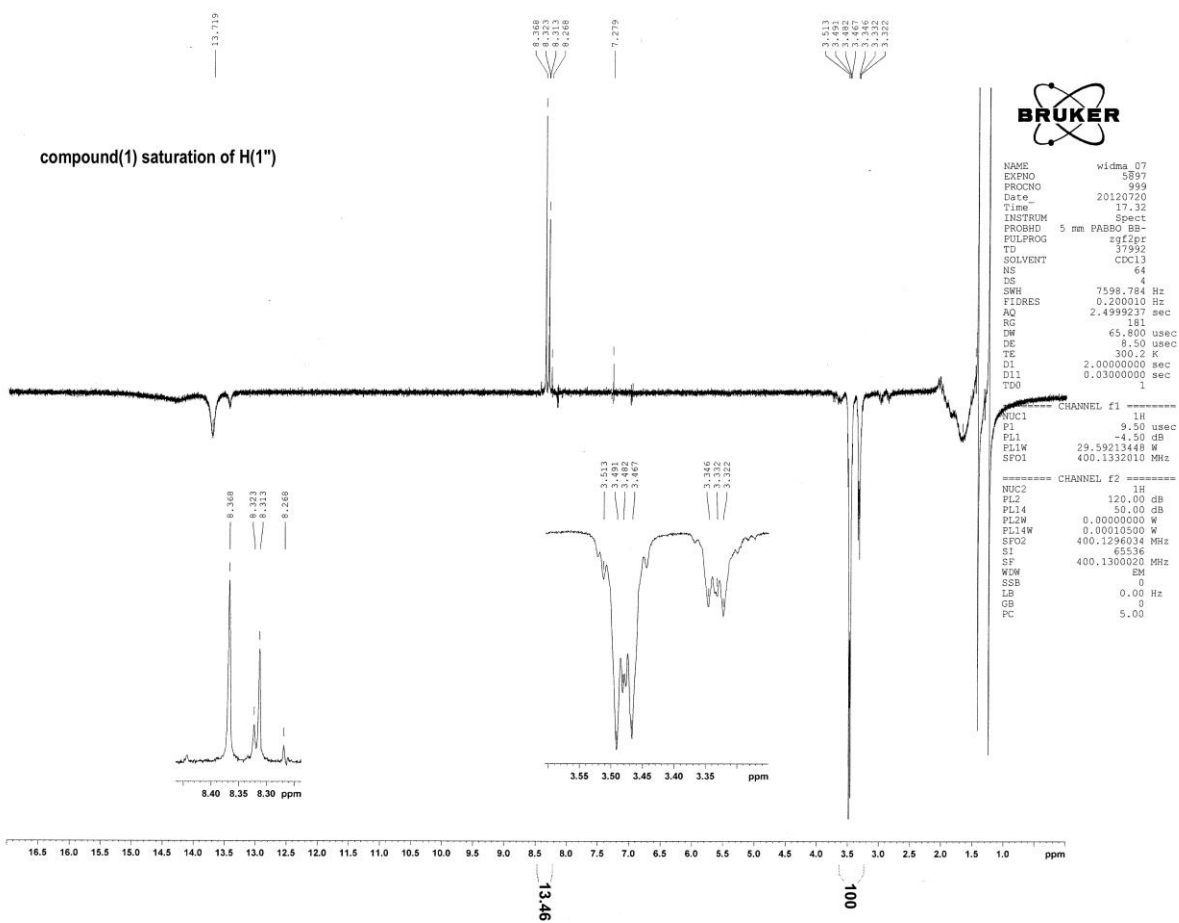

94-79b

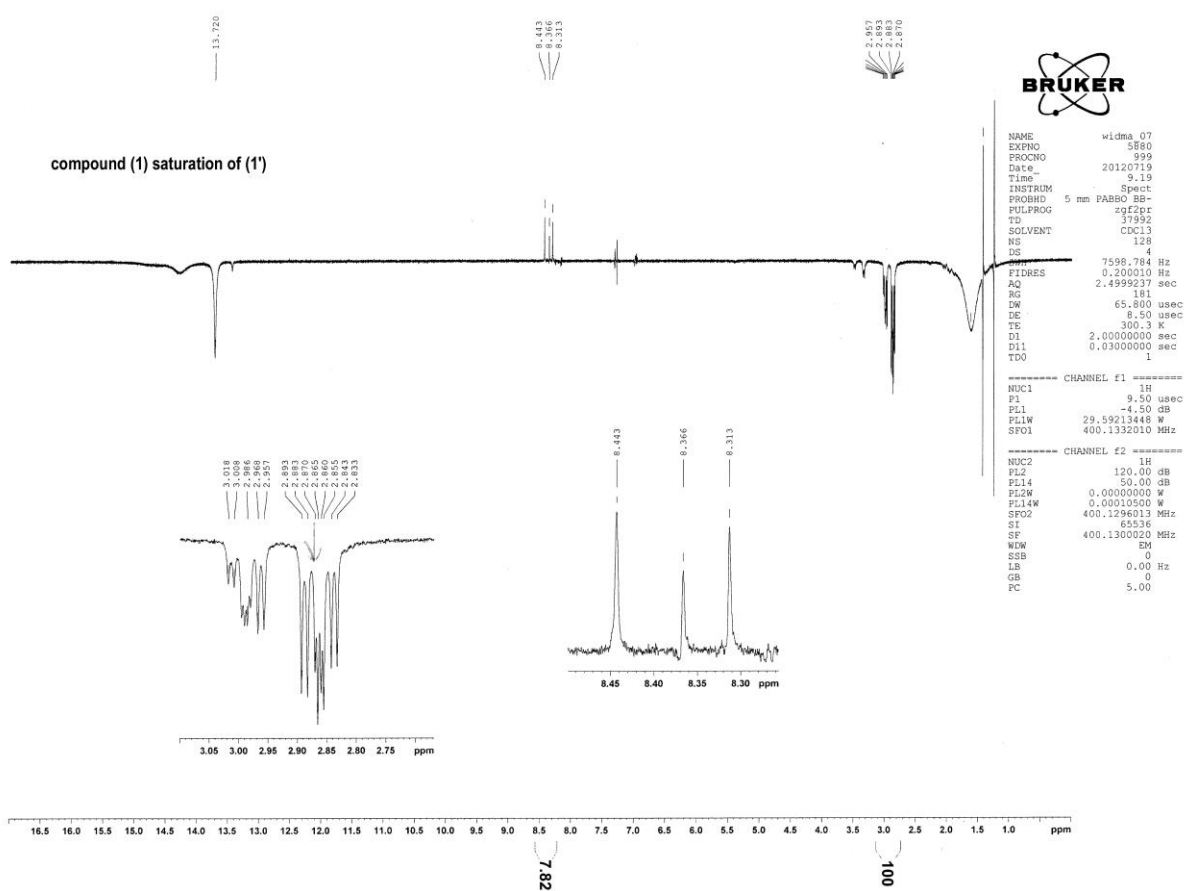

94-79c

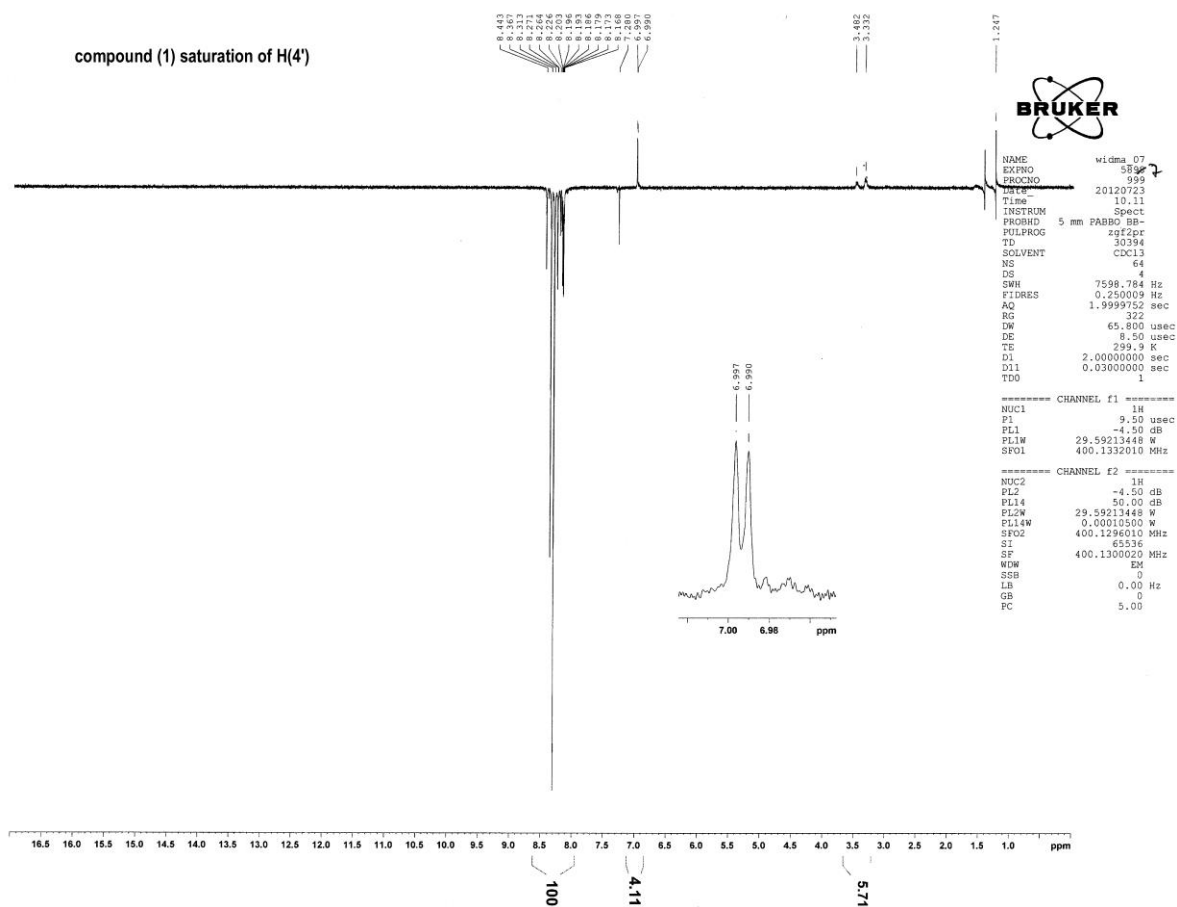

94-79d

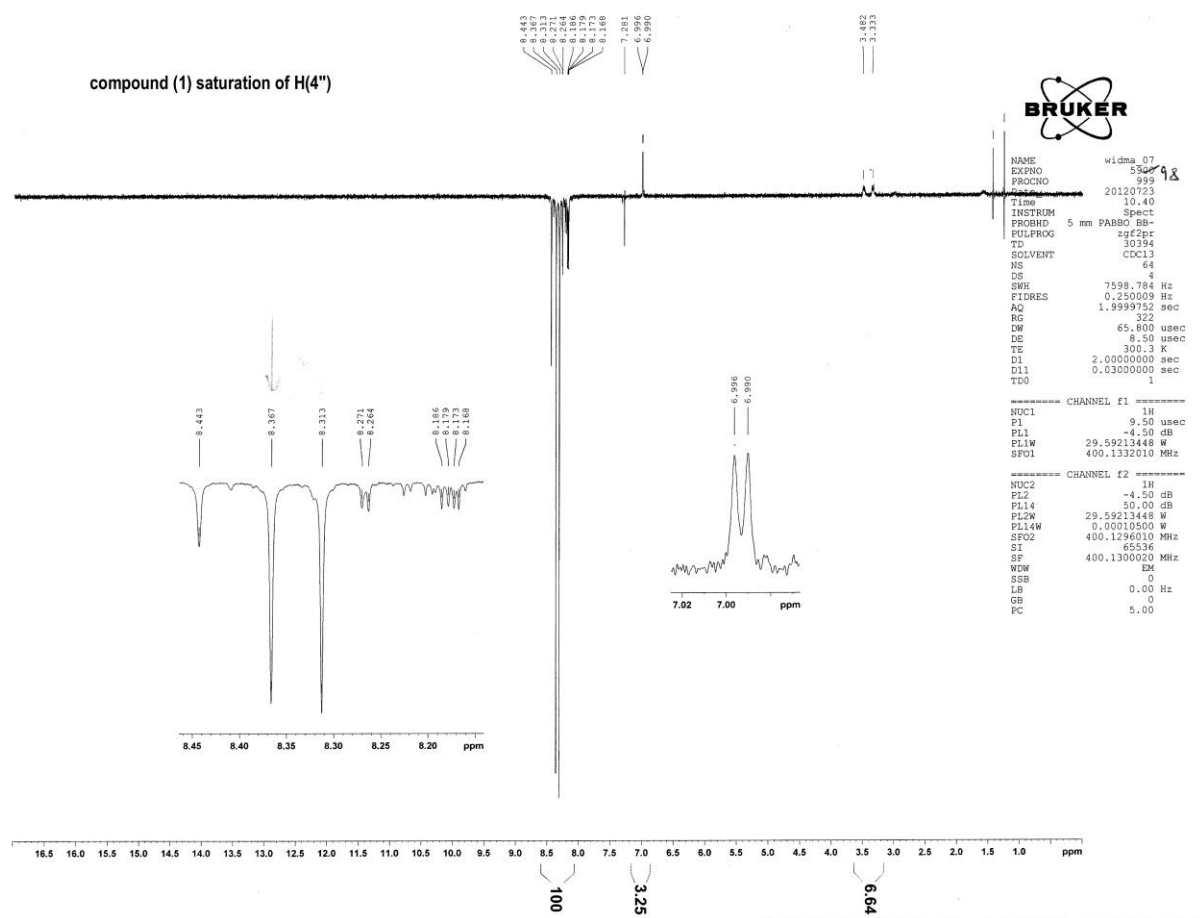

98-81

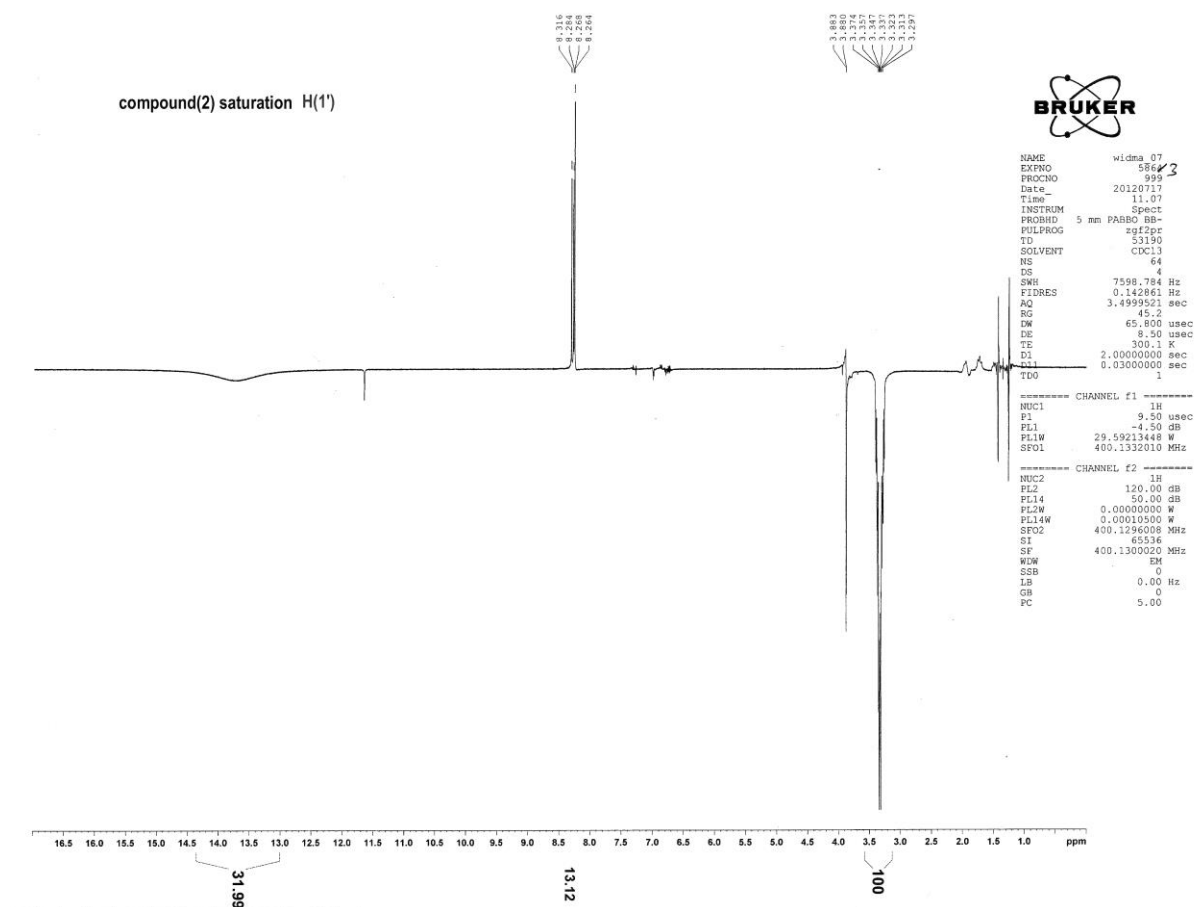

98-81a

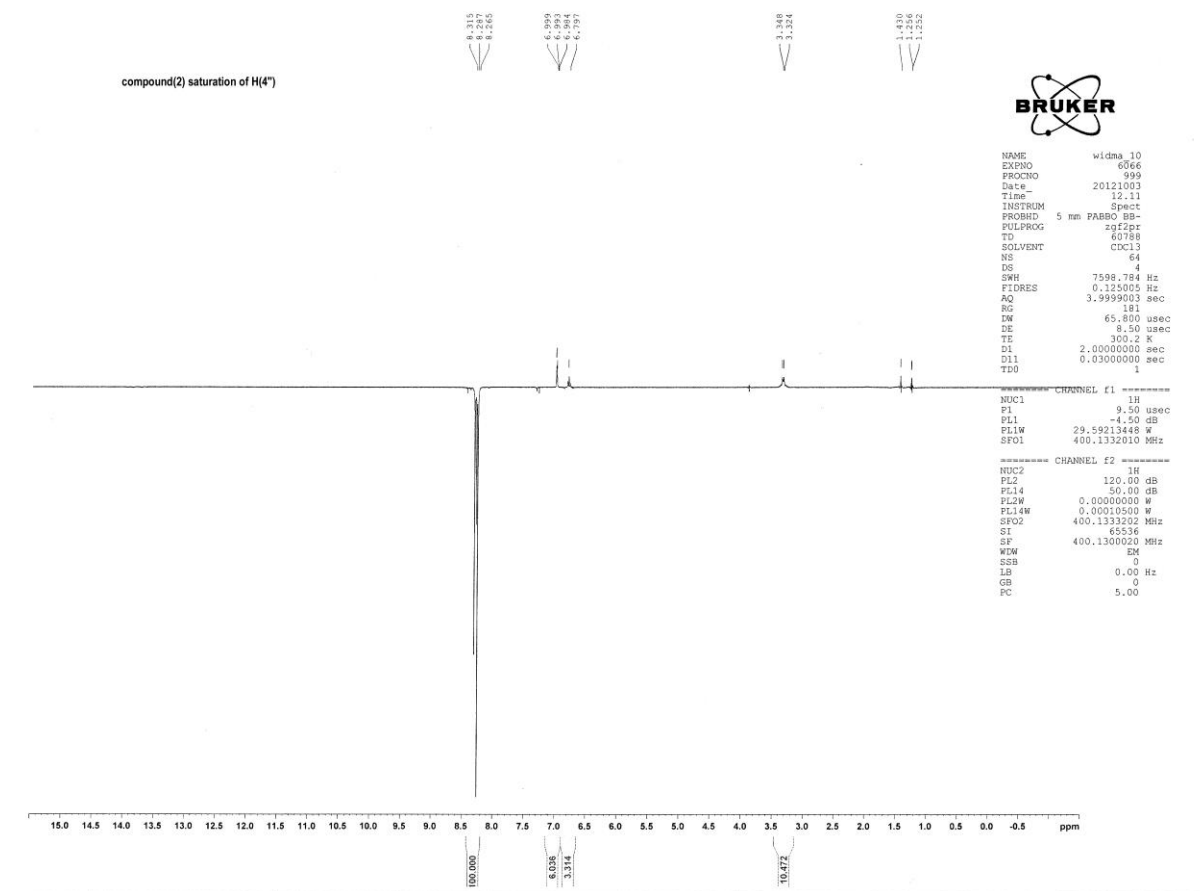



98-81c

compound(2) saturation of H(1")

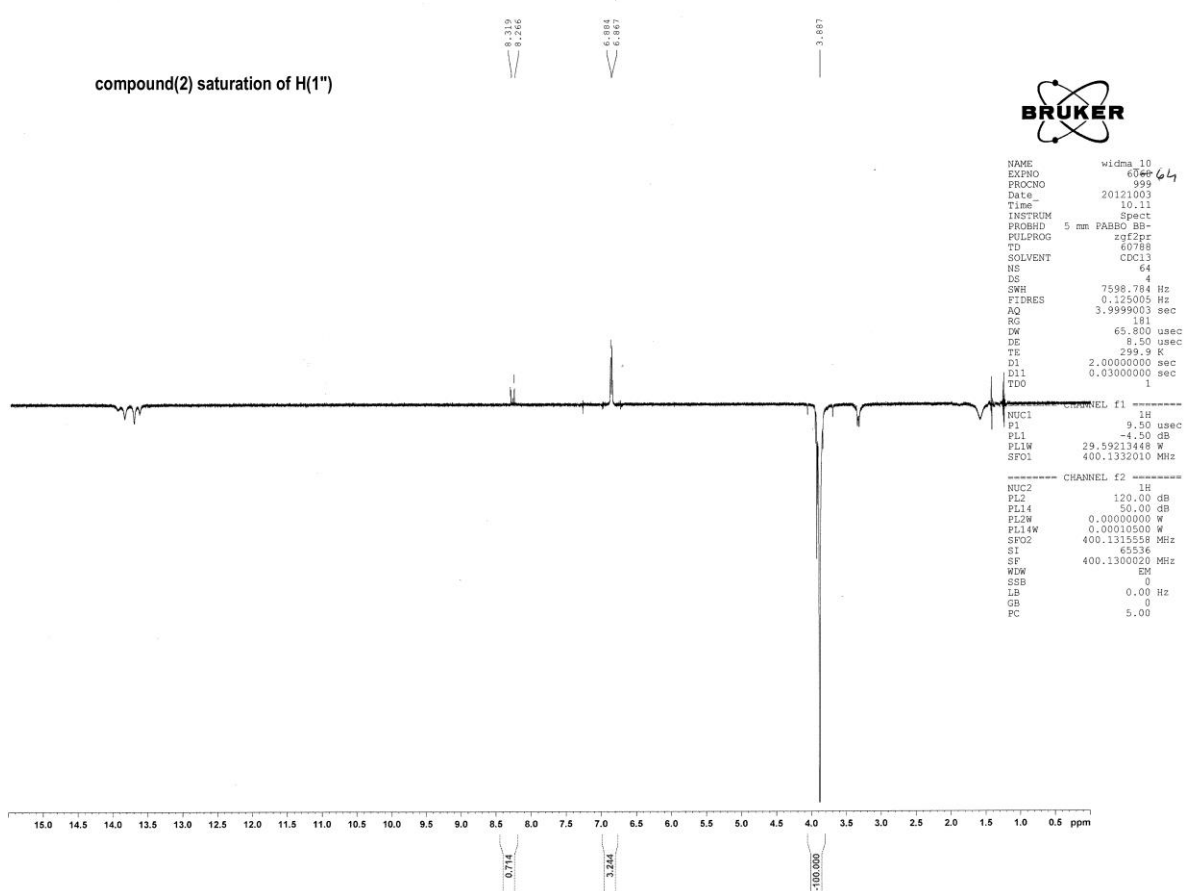

Supplement: c3dt50213a.pdf [file c3dt50213a.pdf]
